# Supplementary material
Source: PubMed Central journal article supplement (PMC6289065)
Supplement: NIHMS1510496-supplement-1.pdf [file NIHMS1510496-supplement-1.pdf]

## Supplementary Online Material

### SOM Table S1

Information on the individuals analyzed in this study.

| Species           | Identifier | Sex    | Age (yrs) | Weight (kg) | Height (cm)    | Source |
|-------------------|------------|--------|-----------|-------------|----------------|--------|
| <b>Human</b>      |            |        |           |             |                |        |
|                   | 3967       | Female | 80        | 45          | 152            | HMS    |
|                   | 3968       | Female | 77        | 59          | 155            | HMS    |
|                   | 3971       | Female | 82        | 54          | 166            | HMS    |
|                   | 3992       | Female | 92        | 47          | 133            | HMS    |
|                   | 3970       | Male   | 70        | 68          | 168            | HMS    |
|                   | 3976       | Male   | 75        | 82          | 175            | HMS    |
|                   | 3978       | Male   | 89        | 68          | 168            | HMS    |
| <b>Macaque</b>    |            |        |           |             |                |        |
|                   | Mm213-99   | Female | 12        | 5.3         | NA             | NERC   |
|                   | Mm166-02   | Female | 9         | 8.0         | NA             | NERC   |
|                   | Mm185-91   | Female | 20        | 7.6         | NA             | NERC   |
|                   | Mm184-98   | Female | 12        | 6.1         | NA             | NERC   |
|                   | Mm185-98   | Female | 13        | 7.2         | NA             | NERC   |
|                   | Mm428-97   | Male   | 14        | 9.2         | NA             | NERC   |
|                   | Mm374-08   | Male   | 6         | 23.6        | NA             | NERC   |
|                   | Mm288-94   | Male   | 16        | 17.7        | NA             | NERC   |
| <b>Chimpanzee</b> |            |        |           |             |                |        |
|                   | 725        | Female | 55        | 63.3        |                | NPRC   |
|                   | 66423      | Female | NA        | NA          | 83(trunk only) | MCZ    |
|                   | 5902       | Male   | 19        | 85          |                | NPRC   |
|                   | 61069      | Male   | NA        | NA          | 83 (head-rump) | MCZ    |

Abbreviations: Harvard Medical School Anatomical Gift Program (HMS), New England Primate Research Center (NERC), Yerkes National Primate Research Center (NPRC), Harvard Museum of Comparative Zoology Collection (MCZ), not available (NA)

**SOM Table S2**

Mean area (cm<sup>2</sup>) of replicate skin samples analyzed from each body region and species.

| Body region | Macaque | Chimpanzee | Human |
|-------------|---------|------------|-------|
| Forehead    | 4.54    | 10.14      | 1.26  |
| Back        | 5.17    | 8.30       | 7.85  |
| Chest       | 5.00    | 9.79       | 7.85  |
| Thigh       | 5.40    | 7.63       | 7.85  |
| Forearm     | 6.10    | 6.97       | 7.85  |

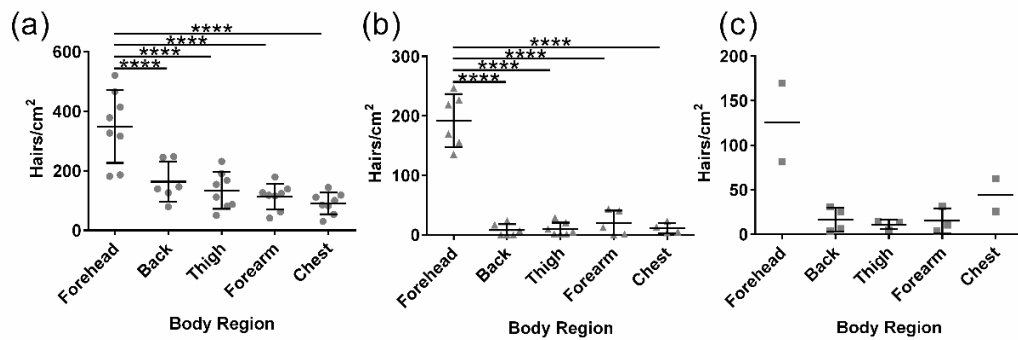

**SOM Fig. S1: Hair density across body regions.** a - c) Forehead hair density is highest in macaques (a) and humans (b), and shows a similar trend in chimpanzees (c). Hair density is shown for each body region within each species. Significant differences in hair density were not detected between other body regions. Each point represents the average density of hair follicles in biological replicates for each individual analyzed. Mean and standard deviation is shown except when sample size did not exceed two

individuals. Significance by one-way ANOVA with Sidak correction for multiple comparisons: \*  $p < 0.05$ , \*\*\*\*  $p < 0.0001$ .

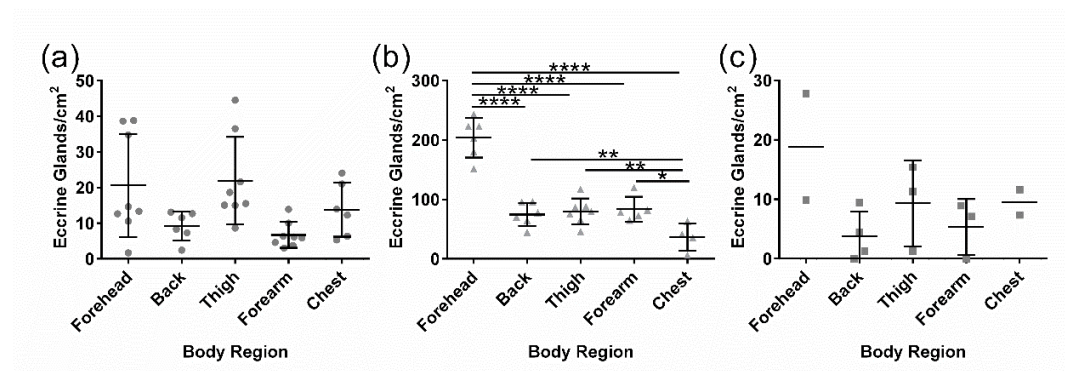

**Fig. S2: Eccrine gland density across body regions.** a - c) Eccrine gland density does not significantly vary between body regions in chimpanzees (c) and macaques (a), but in humans the forehead has the highest detected density of eccrine glands (b). Human eccrine gland density is lowest in the chest (b). Eccrine gland density is shown for each body region within each species. Each point represents the average density in biological replicates for each individual analyzed. Mean and standard deviation are shown except when sample size did not exceed two individuals. Significance by one-way ANOVA with Sidak correction for multiple comparisons: \*  $p < 0.05$ , \*\*  $p < 0.01$ , \*\*\*\*  $p < 0.0001$ .

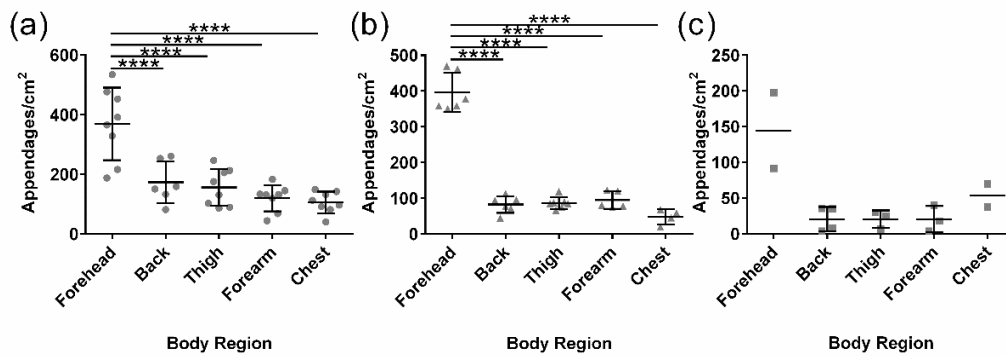

**SOM Fig. S3: Comparison of combined ectodermal appendage density across body regions.** a - c) The combined density of hair and eccrine glands is highest in the forehead, reaching statistical significance in macaques (a) and humans (b), and showing a similar trend in chimpanzees (c). The total appendage density for each body region is shown within each species. Significant differences in total appendage density were not detected between other body regions in any species. Each point represents the average density of appendages in biological replicates for each individual analyzed. Mean and standard deviation are shown except when sample size did not exceed two individuals. Significance by one-way ANOVA with Sidak correction for multiple comparisons: \*\*\*\*  $p < 0.0001$ .

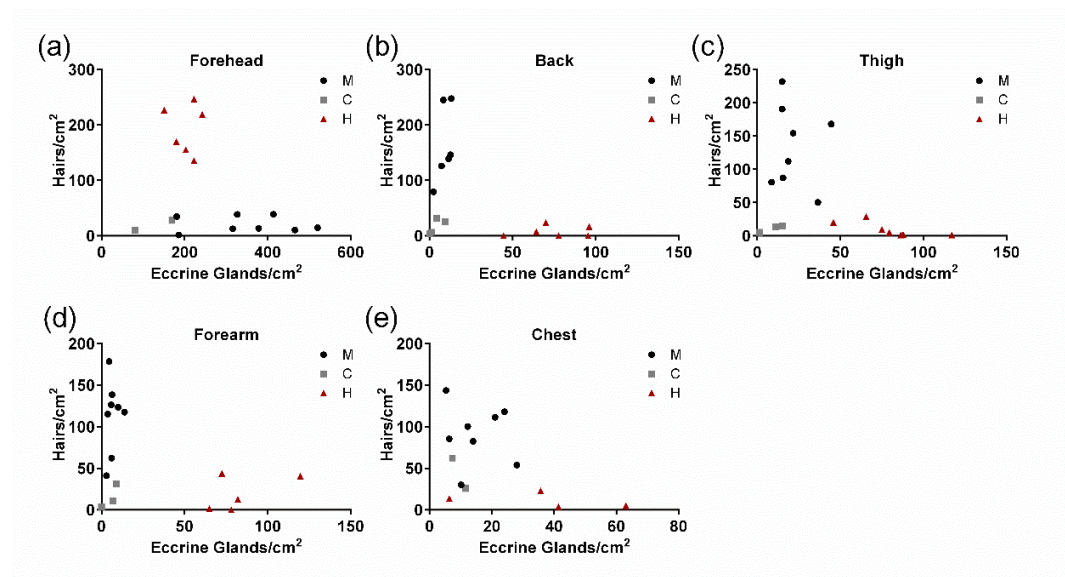

**SOM Fig. S4: Relative density of hair and eccrine glands within each body region and species.** a-e) There is no correlation between hair and eccrine gland density in primate skin. Mean hair density versus sweat gland density is plotted for each individual for each body region in each species. Spearman correlation coefficient was calculated for each dataset. For all correlation tests the  $p$  value exceeded 0.05 indicating no

significant deviation from the null hypothesis that hair and eccrine gland density variables were not correlated.
